# Supplementary material
Source: PubMed Central journal article supplement (PMC8887959)

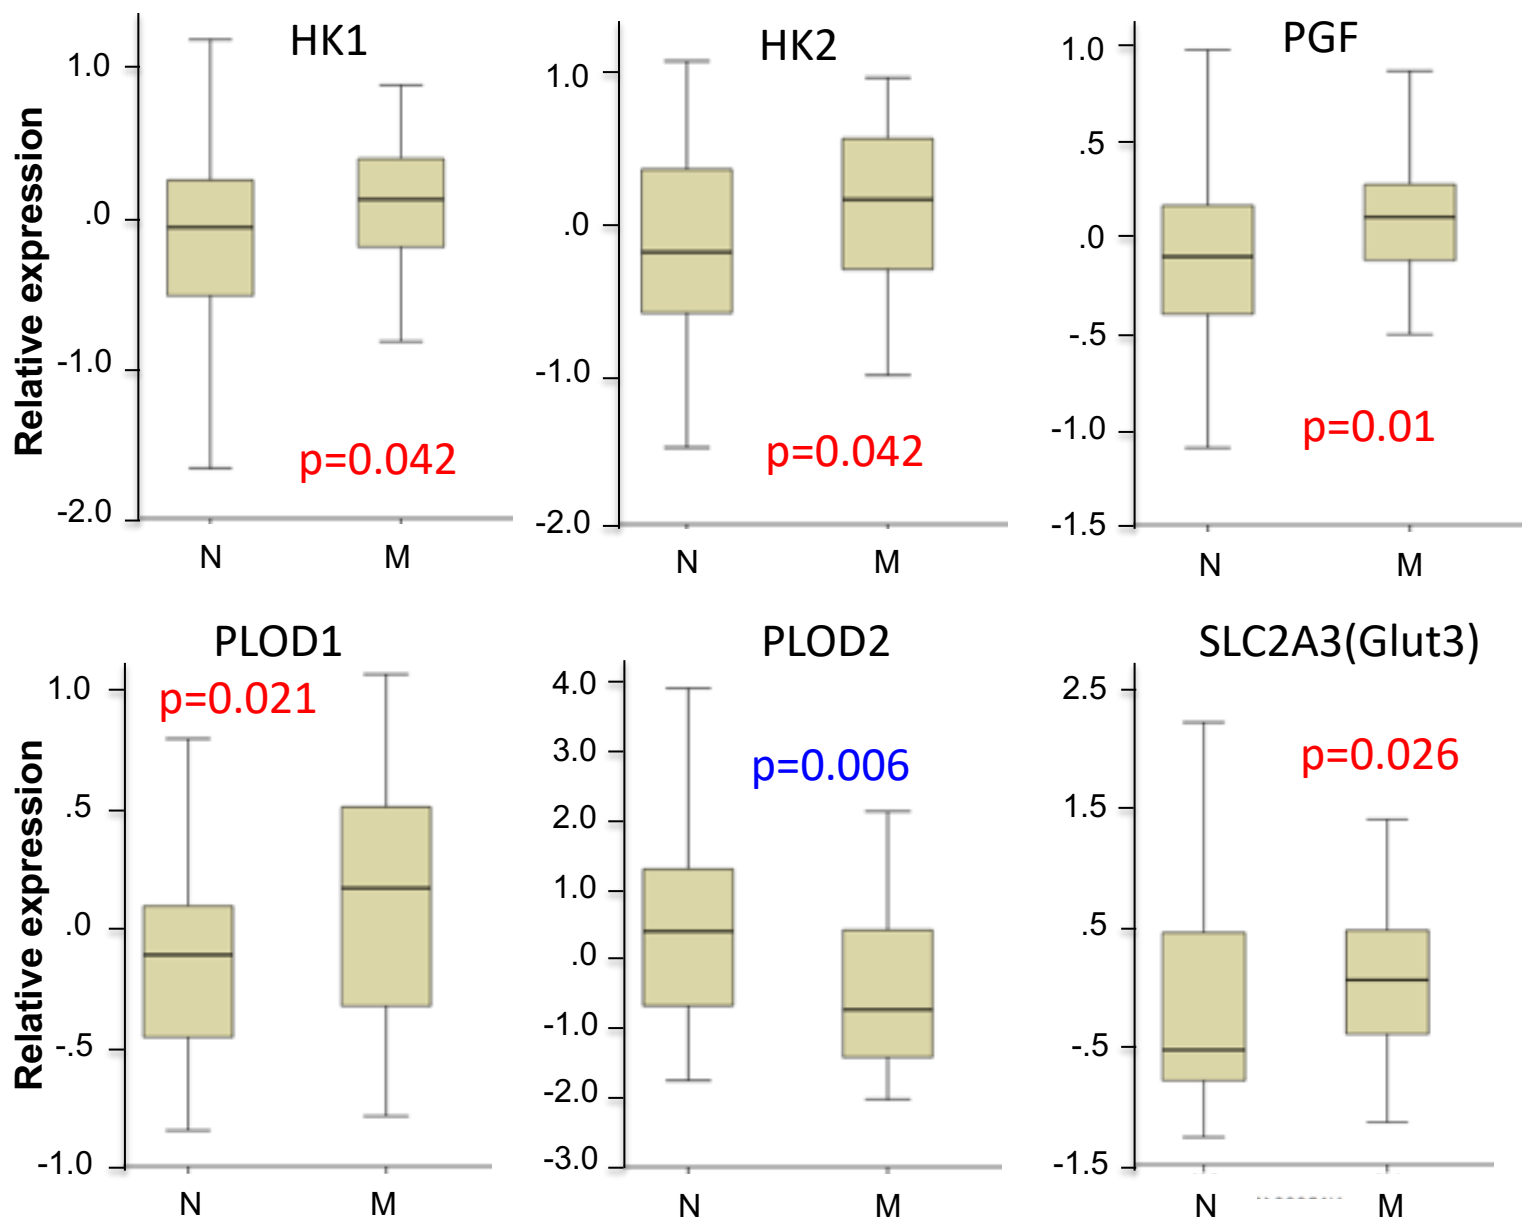

Supplementary Figure 3

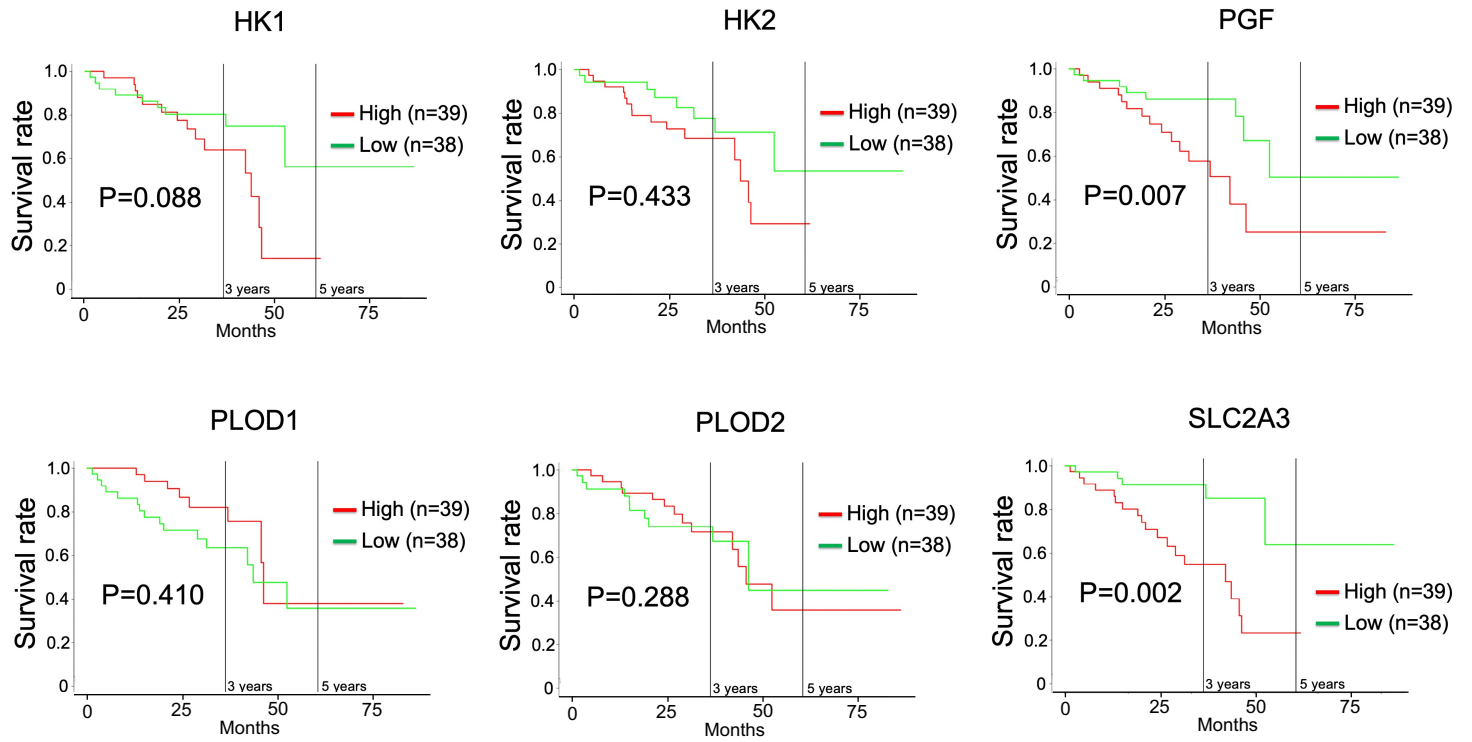

Dataset: TCGA

**A**

|       | $C_{\max}$<br>( $\mu\text{g/ml}$ ) | $T_{\max}$<br>(h) | $AUC_{0 \rightarrow \infty}$<br>( $\mu\text{g/h}\cdot\text{ml}$ ) | $t_{1/2,e}$<br>(h) | MRT<br>(h) | CL<br>( $\text{ml/kg}\cdot\text{h}$ ) |
|-------|------------------------------------|-------------------|-------------------------------------------------------------------|--------------------|------------|---------------------------------------|
| eye   | 8                                  | 4                 | 87                                                                | 1                  | 17         | 630                                   |
| liver | 91                                 | 4                 | 983                                                               | 0.02               | 21         | 61                                    |

**B**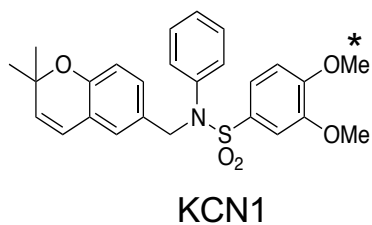**C**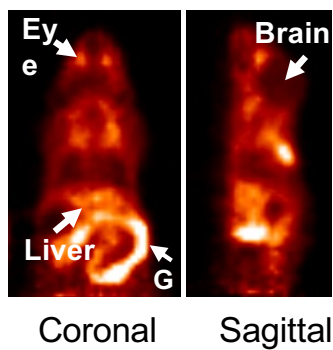**D**Time Activity Curve of [ $^{11}\text{C}$ ]KCN1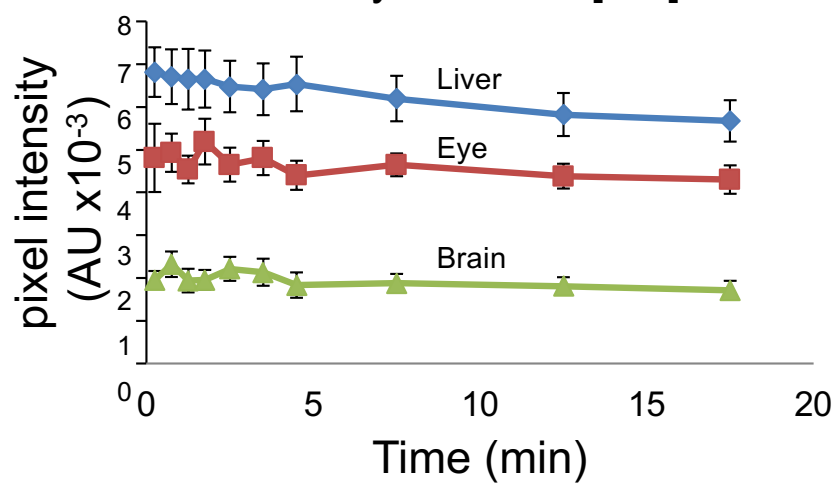



Supplementary Figure 5

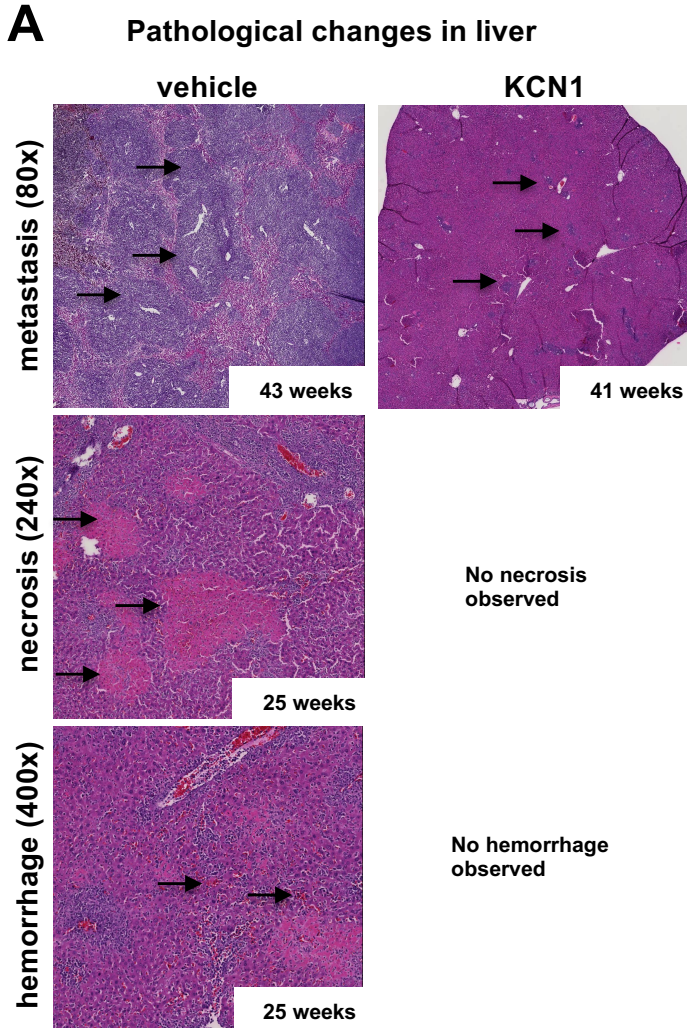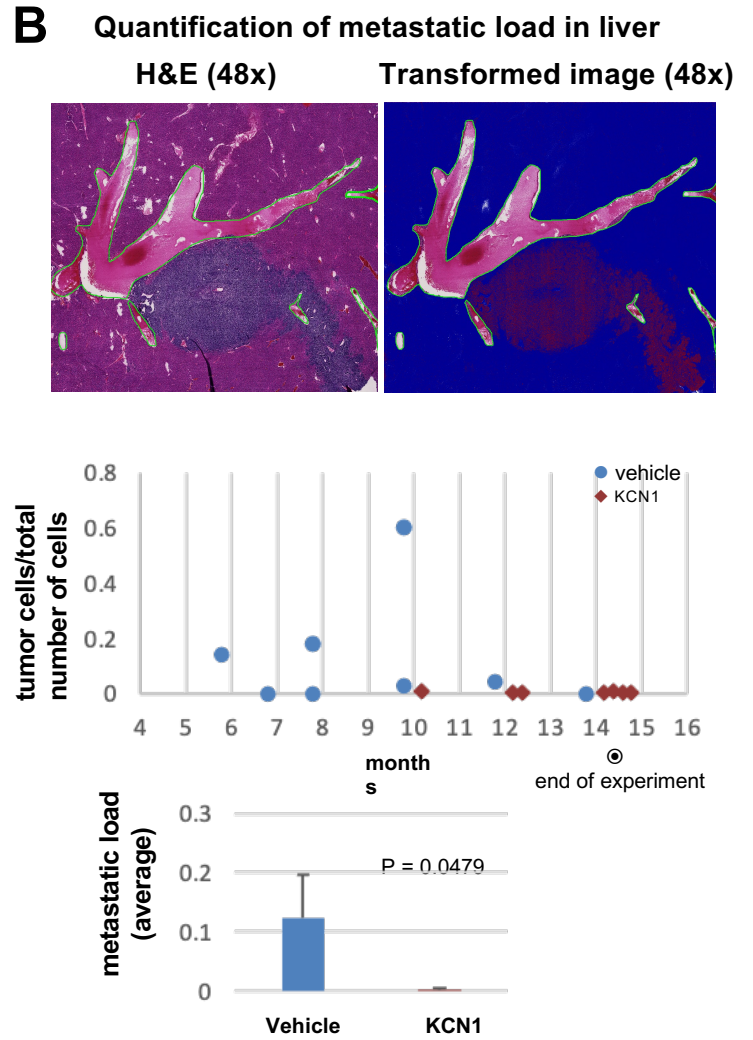

Metastases in other organs (80x)

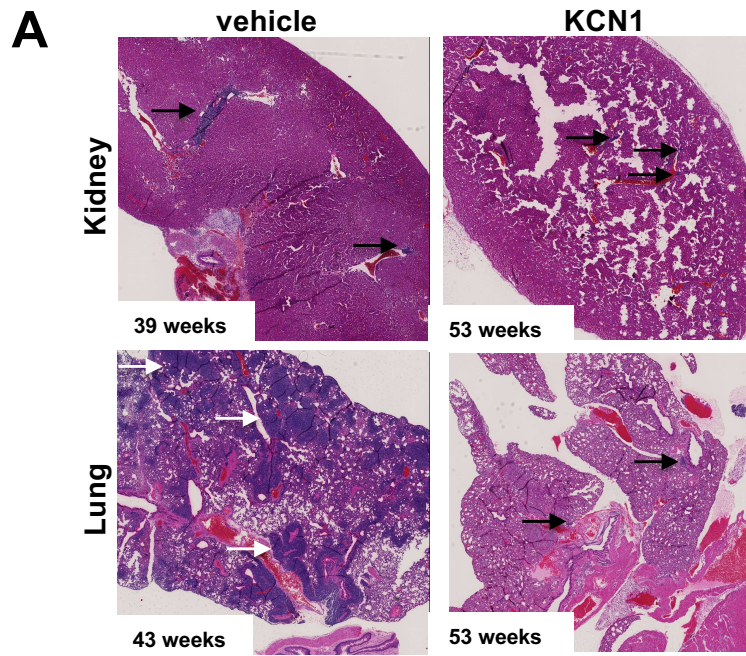

**B**

| % of mice with mets (regardless of size) | organ   |        |      |       |
|------------------------------------------|---------|--------|------|-------|
|                                          | Liver * | kidney | lung | heart |
| vehicle                                  | 100     | 50     | 75   | 0     |
| KCN1                                     | 100     | 29     | 66   | 0     |

**A**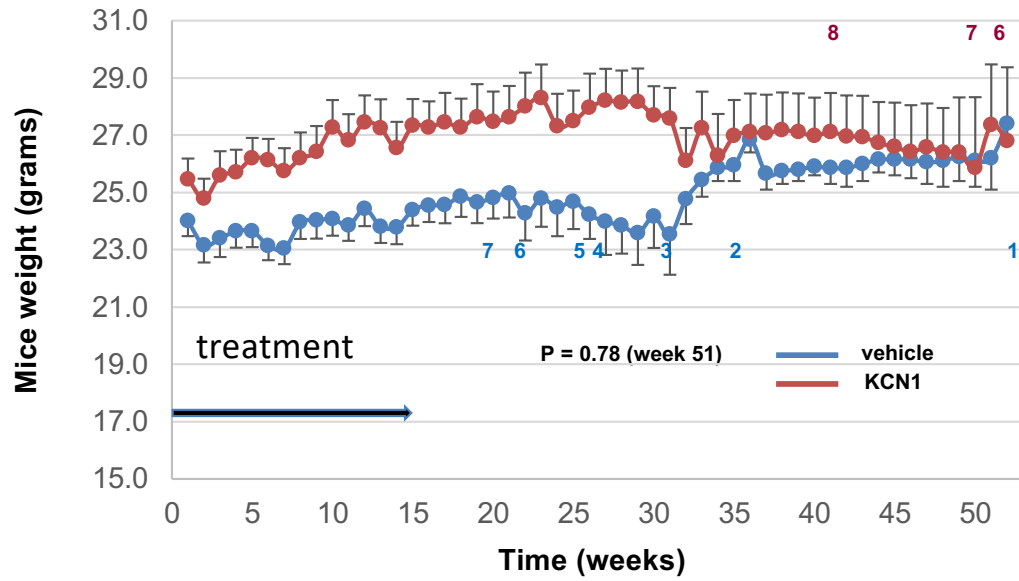**B**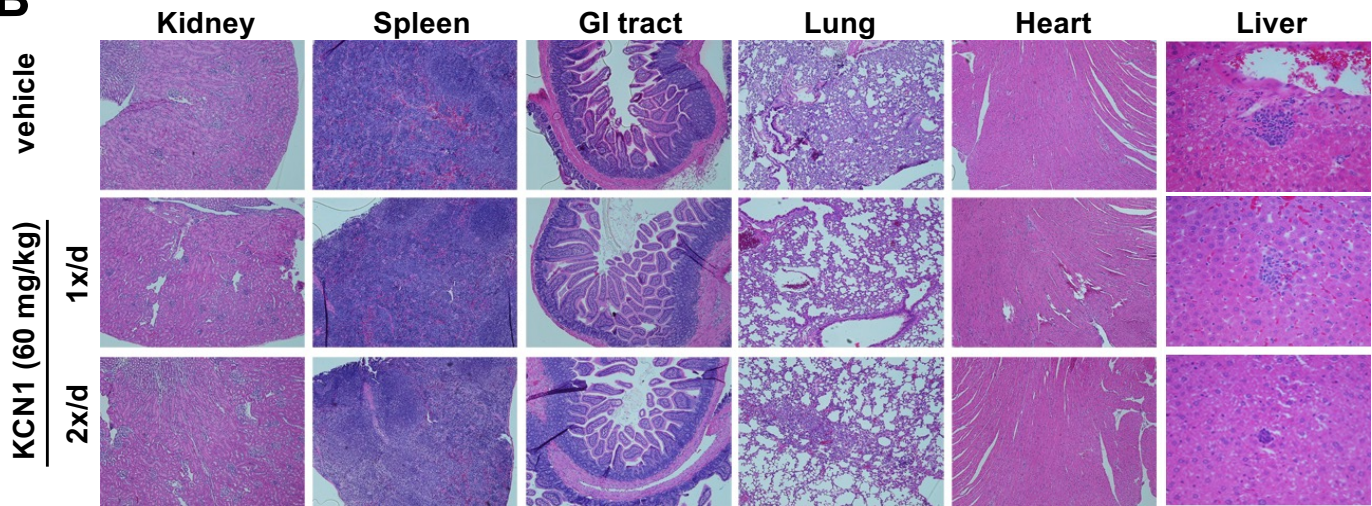



Hypoxia

NT

siCtrl

siP4HA1

siP4HA2

siP4HA1/A2

vehicle

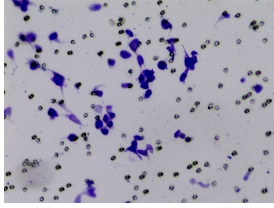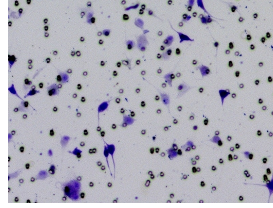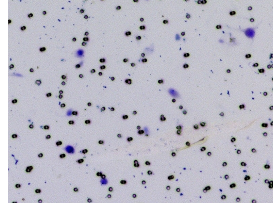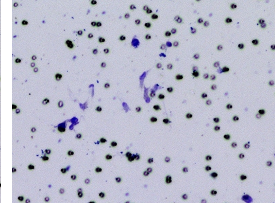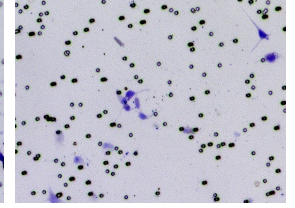

KCN1

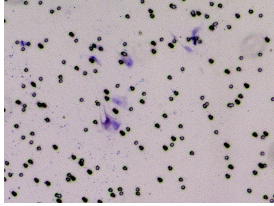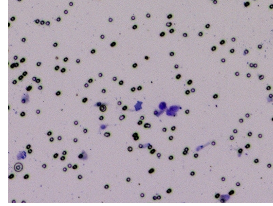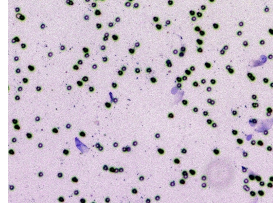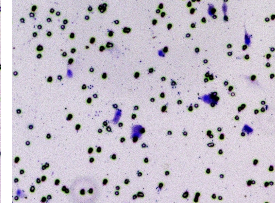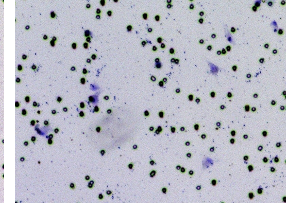

# Collagen mRNA expression in UM TCGA dataset

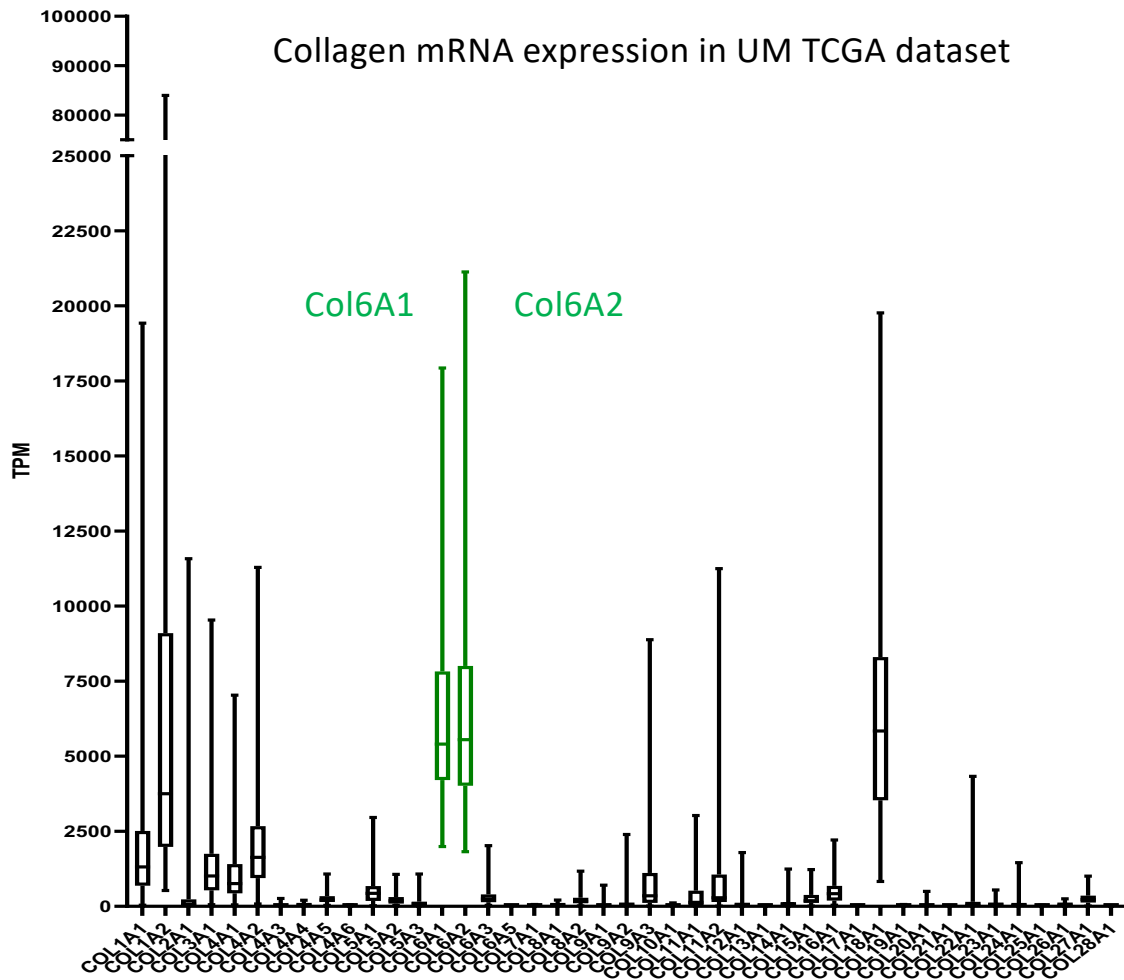

Supplement: NIHMS1771431-supplement-Suppl_figures.pdf [file NIHMS1771431-supplement-Suppl_figures.pdf]
